1 **Title:** Longitudinal associations between mild behavioral impairment, sleep disturbance, and  
2 progression to dementia

3 **Author Names:** Dinithi Mudalige<sup>1</sup>, Dylan X. Guan<sup>1</sup>, Maryam Ghahremani<sup>2</sup>, Zahinoor Ismail,  
4 MD<sup>3\*</sup>

5 (1) University of Calgary, Calgary, AB, Canada; (2) Hotchkiss Brain Institute, University of Calgary, Calgary, AB, Canada; (3)  
6 Department of Psychiatry, Department of Community Health Sciences, Department of Clinical Neurosciences, Hotchkiss Brain  
7 Institute, University of Calgary, Calgary, AB, Canada; Department of Clinical and Biomedical Sciences, Faculty of Health and  
8 Life Sciences, University of Exeter, Exeter, UK.

9  
10 **Running Title:** Mild behavioral impairment, sleep & dementia

11  
12 \*Corresponding Author:  
13 Zahinoor Ismail  
14 3280 Hospital Dr. NW Calgary AB  
15 Canada T2N 4Z6  
16 403-210-6900  
17 [ismailz@ucalgary.ca](mailto:ismailz@ucalgary.ca)  
18  
19

## 20 **ABSTRACT**

21 **Background:** Clinical guidelines recommend incorporating non-cognitive markers like mild  
22 behavioral impairment (MBI) and sleep disturbance (SD) into dementia screening to improve  
23 detection.

24 **Objective:** We investigated the longitudinal associations between MBI, SD, and incident  
25 dementia.

26 **Methods:** Participant data were from the National Alzheimer's Coordinating Center in the  
27 United States. MBI was derived from the Neuropsychiatric Inventory Questionnaire (NPI-Q)  
28 using a published algorithm. SD was determined using the NPI-Q nighttime behaviors item. Cox  
29 proportional hazard regressions with time-dependant variables for MBI, SD, and cognitive  
30 diagnosis were used to model associations between baseline 1) MBI and incident SD (n=11277);  
31 2) SD and incident MBI (n=10535); 3) MBI with concurrent SD and incident dementia  
32 (n=13544); and 4) MBI without concurrent SD and incident dementia (n=11921). Models were  
33 adjusted for first-visit age, sex, education, cognitive diagnosis, race, and for multiple  
34 comparisons using the Benjamini-Hochberg method.

35 **Results:** The rate of developing SD was 3.1-fold higher in older adults with MBI at baseline  
36 compared to those without MBI (95%CI: 2.8-3.3). The rate of developing MBI was 1.5-fold  
37 higher in older adults with baseline SD than those without SD (95%CI: 1.3-1.8). The rate of  
38 developing dementia was 2.2-fold greater in older adults with both MBI and SD, as opposed to  
39 SD alone (95%CI:1.9-2.6).

40 **Conclusions:** There is a bidirectional relationship between MBI and SD. Older adults with SD  
41 develop dementia at higher rates when co-occurring with MBI. Future studies should explore the  
42 mechanisms underlying these relationships, and dementia screening may be improved by  
43 assessing for both MBI and SD.  
44  
45

46 **Keywords:** Alzheimer's disease, sleep disorders, neurobehavioral manifestations, dementia,  
47 longitudinal studies  
48

## 49 INTRODUCTION

50 Dementia is currently the seventh leading cause of death worldwide, and 152 million  
51 people are expected to develop dementia by 2050 [1, 2]. Alzheimer’s disease (AD) is the most  
52 common cause of dementia [3]. With some recent exceptions, clinical trials for AD disease-  
53 modifying therapies have largely been unsuccessful at meeting primary endpoints, partly because  
54 of administration too late in the disease course [4]. Therefore, there is a crucial need for  
55 improved detection of older adults at risk of dementia to facilitate the development of therapeutic  
56 and preventative interventions and to identify those with early-stage disease potentially suitable  
57 to treat with disease-modifying therapies.

58 Clinical guidelines have recommended the use of non-cognitive markers of dementia for  
59 improved dementia detection [5, 6]. Two of these markers are mild behavioral impairment (MBI)  
60 and sleep disturbance (SD). MBI is a neurobehavioral syndrome that captures later-life emergent  
61 and persistent neuropsychiatric symptoms (NPS), representing a change from longstanding  
62 behavior or personality, as a high-risk state for incident dementia [7]. MBI symptoms are  
63 categorized into five domains: decreased drive and motivation (apathy), affective dysregulation  
64 (mood and anxiety symptoms), impulse dyscontrol (agitation, impulsivity, abnormal reward  
65 salience), social inappropriateness (impaired social cognition), and abnormal perception or  
66 thought content (hallucinations and delusions, i.e., psychotic symptoms). SD can include a  
67 variety of disturbances, including insomnia, REM sleep disorder, sleep apnea, and restless leg  
68 syndrome, the most common of which is insomnia (i.e., difficulties falling and staying asleep),  
69 resulting in excessive daytime sedation [8].

70 Cross-sectional studies have indicated that MBI and SD may be associated with each  
71 other. For instance, behavioral symptoms may contribute to insomnia [9]. Conversely, SD may  
72 increase susceptibility to behavioral symptoms [10, 11].

73 Both MBI and SD are associated with greater cognitive decline and dementia. First,  
74 studies have indicated that MBI is associated with cognitive impairment cross-sectionally [12,  
75 13] and incident cognitive decline and dementia longitudinally in cognitively normal (CN) older  
76 adults [14, 15], mixed CN and mild cognitive impairment (MCI) samples [16-22] and in MCI  
77 [23]. Analogous to MBI, several studies have demonstrated associations between SD and  
78 cognitive decline leading to dementia [24-26]. This risk extends to the preclinical stage in CN  
79 older adults, as both MBI and SD can precede typical symptoms of AD, such as memory loss,  
80 and associate with a greater risk of incident dementia [15, 27]. Despite evidence suggesting that  
81 both MBI and SD are associated with dementia risk, the relationship between MBI and SD and  
82 their combined prognostic utility is poorly understood.

83 This study investigated bidirectional associations between MBI and SD and determined if  
84 the prognostic utility of SD for incident dementia could be improved by further adding MBI to  
85 the modeling. We hypothesized that older adults with MBI would develop SD at a faster rate,  
86 and vice versa, due to potential positive feedback. Additionally, we hypothesized that sleep-  
87 disturbed older adults with MBI would develop dementia at a faster rate than SD older adults  
88 without MBI due to the additive effects of MBI and SD.

89

## 90 **METHOD**

### 91 *Study Design*

92 The National Alzheimer's Coordinating Center (NACC) Uniform Data Set (UDS) was  
93 used, including participant data collected approximately annually from June 2005 to May 2022.  
94 The NACC was established by the National Institute on Aging and consisted of data  
95 prospectively collected from 45 NIA-funded Alzheimer's Disease Research Centers (ADRCs)  
96 across 26 states since 1999 [28]. Data are primarily collected by trained clinicians and clinical  
97 staff from participants and informants. Extensive descriptions of NACC recruitment and data

98 collection procedures have been published elsewhere [28-31]. Participants and informants  
99 provided informed consent at the ADRC, and the respective Institutional Review Board  
100 approved all studies conducted at ADRCs that provided data to NACC.

101

## 102 *Participants*

103 The overall sample from the NACC-UDS consisted of 45100 participants. For this study  
104 to satisfy the MBI criterion of later-life emergence of NPS [7], only participants older than 50  
105 years old (n=1069) with no prior psychiatric or developmental disorders (e.g., post-traumatic  
106 stress disorder (PTSD), bipolar disorder, anxiety disorder, schizophrenia, obsessive-compulsive  
107 disorder (OCD), Downs syndrome, Huntington's, or Parkinson's disease were included ( $n =$   
108 14556). Participants missing data for demographic information (n=244) and Neuropsychiatric  
109 Inventory Questionnaire (NPI-Q) domains required to derive MBI ( $n = 910$ ) and SD status  
110 ( $n=72$ ) were excluded [Figure 1]. All participants were required to have no diagnosis of dementia  
111 at baseline and have at least one follow-up visit. The clinician diagnosis in the NACC-UDS was  
112 used to determine cognitive status, including dementia.

113 For the longitudinal analyses examining the association between baseline MBI status and  
114 incident SD (and vice versa), additional criteria were applied, as illustrated in Figure 1. The  
115 sample sizes for the analyses examining the association between baseline MBI and incident SD  
116 and baseline SD and incident MBI were 11277 and 10535, respectively. The sample sizes for the  
117 analyses examining the association between baseline MBI within sleep-disturbed older adults  
118 and incident dementia and within non-sleep-disturbed older adults and incident dementia were  
119 13544 and 11921, respectively.

## 120 *Measures*

### 121 Sleep disturbance

122 SD was measured using the NPI-Q nighttime behaviors item, as described in previous  
123 studies [32-35]. The nighttime behaviors item asks informants: “Does the patient awaken you  
124 during the night, rise too early in the morning, or take excessive naps during the day?” to which  
125 informants respond “Yes” or “No” and rate the severity of the SD on a scale of 1-3 if present.  
126 For the present study, only the reported presence or absence of SD was utilized.

127

### 128 **Mild Behavioral Impairment**

129 MBI was derived from the NPI-Q [36] using a published algorithm [37, 38]. The MBI  
130 decreased motivation score, with a range of 0-3, was directly derived from the NPI-Q apathy  
131 score. The MBI emotional dysregulation score, with a range of 0-9, was derived by summing the  
132 NPI-Q depression, anxiety, and elation scores. The MBI impulse dyscontrol score, with a range  
133 of 0-9, was derived by summing the NPI-Q agitation, irritability, and motor behavior scores. The  
134 MBI social inappropriateness score, with a range of 0-3, was derived directly from the NPI-Q  
135 disinhibition score. Lastly, the MBI abnormal perception/thought content score, ranging from 0-  
136 6, was derived by summing the NPI-Q delusions and hallucination scores. The global MBI score  
137 was then derived by summing up the five domain scores for each visit, with a range of 0-30, with  
138 higher scores indicating greater MBI symptom severity. However, for this study, MBI was  
139 dichotomized, where a global MBI score >0 indicated presence. To meet the MBI symptom  
140 persistence criterion, symptoms had to be present (global MBI score>0) at two consecutive  
141 NACC visits prior to dementia onset [7].

142

### 143 ***Statistical Analysis***

144 Participant demographics were summarized using descriptive statistics (means, standard  
145 deviations, medians, interquartile ranges, ranges, counts, and percentages). To compare between  
146 groups, Wilcoxon signed-rank tests, and chi-squared tests were used.

147 To determine baselines for survival models, a participant-specific baseline was generated  
148 based on the first instance of symptom positivity for both MBI and SD. For each participant, the  
149 baseline was set to the visit at which symptoms of either MBI or SD were endorsed to  
150 correspond to the onset of behavioral symptoms or sleep disturbance. For participants who did  
151 not develop MBI or SD before dementia incidence, the first study visit was considered baseline.  
152 MBI positivity required two consecutive NPS+ visits consistent with the MBI symptom  
153 persistence criterion [7]. The presence of SD, however, required only a single-visit endorsement  
154 of symptoms.

155 Survival analyses were completed utilizing Kaplan-Meier (KM) survival curves and Cox  
156 proportional hazards regressions with time-dependent variables for MBI, SD, and cognitive  
157 diagnosis. Four models were built for 1) the association between baseline MBI status and  
158 incident SD; 2) the association between baseline SD and incident MBI; 3) the association  
159 between baseline MBI with concurrent SD and incident dementia; 4) the association between  
160 baseline MBI without concurrent SD and incident dementia. Participants were followed up for a  
161 maximum of 16.3 years for analyses 1, 2, and 4 and 15.4 years for the third analysis; however,  
162 for ease of visualization, KM curves were truncated to 12 years without omitting any data [39].  
163 Participant age at the first visit, sex, years of education, cognitive diagnosis (CN or MCI), and  
164 race were included as covariates. These covariates were chosen because they are associated with  
165 an increased risk for dementia [23, 40, 41]. All p-values were adjusted for multiple comparisons  
166 using the Benjamini–Hochberg method to generate q-values. The proportional hazards (PH)  
167 assumption of the Cox PH models was confirmed using Schoenfeld residuals. R version 4.0.5  
168 was used to conduct all statistical analyses [42].

169

## 170 **RESULTS**

### 171 *Participant Characteristics*

172 Baseline participant demographics have been summarized in Table 1. Table 2 include  
173 participant characteristics for each model stratified by baseline MBI or SD status. In general, the  
174 four analyses had similar sample sizes, with the analysis of baseline MBI status in those without  
175 SD and incident dementia having the largest sample of 11921 participants. Across analyses, at  
176 baseline, participants were, on average, about 72 years old, had 15 years of education, and were  
177 majority female and CN (Table 1).

178

### 179 ***Analysis 1: Association Between Baseline MBI and Incident Sleep Disturbance***

180 Of the total sample ( $n=11277$ ), 6658 (59.0%) were female, with a mean first-visit age of  
181 72.7 years ( $SD=8.8$ , range=50-104), and mean 15.7 ( $SD=3.1$ , range=0-29) years of education. Of  
182 this sample, 8579 (76.1%) were CN, 2698 (23.9%) had MCI, and 8721 (77.3%) were White. A  
183 total of 1562 (13.9%) participants had MBI, and 9715 (86.1%) had no MBI. The MBI group  
184 comprised significantly more males and those with MCI [Table 2].

185 Over the total follow-up period of 4.8 ( $SD=3.6$ , range=0.4-16.3) years, 2467 (21.9%)  
186 individuals developed SD before dementia. KM survival curves at a median follow-up time of 6  
187 years showed that sleep-disturbance-free survival in the no MBI group was 75.5% (95%CI:74.3-  
188 76.6) and in the MBI group was 47.7% (95% CI:44.1-51.5) [Figure 2]. Cox proportional hazards  
189 regressions showed that the MBI group had a 3.0-fold (95%CI:2.8-3.3,  $q<0.001$ ) greater rate of  
190 developing SD relative to those without MBI [Table 3].

191

### 192 ***Analysis 2: Association Between Baseline Sleep Disturbance and Incident MBI***

193 Of the total sample ( $n=10535$ ), 6412 (60.9%) were female, with a mean first-visit age of  
194 72.7 ( $SD=8.8$ , range=50-101) years, and mean 15.7 ( $SD=3.2$ , range=0-29) years of education. Of  
195 this sample, 8375 (79.5%) were CN, 2160 (20.5%) had MCI, and 8063 (76.5%) were White. A

196 total of 820 (7.8%) participants had SD, and 9715 (92.2%) had no SD. The SD group comprised  
197 significantly more females and CN individuals [Table 2].

198 Over the total follow-up period of 4.9 (SD=3.6, range=0.4-16.3), 1504 (14.3%)  
199 individuals developed MBI. KM survival curves at a median follow-up time of 6 years showed  
200 that MBI-free survival in the no SD group was 81.6% (95%CI:80.5-82.6) and in the SD group,  
201 was 74.3% (95%CI:70.2-78.7) [Figure 2]. Cox proportional hazards regressions showed that  
202 participants with SD at baseline had a 1.5-fold (95%CI:1.3-1.8,  $q < 0.001$ ) greater rate of  
203 developing MBI than those without SD [Table 3].

204

205 ***Analysis 3: Association Between Baseline Sleep Disturbance and Incident Dementia, stratified***  
206 ***by MBI status***

207 Of the total sample ( $n=1567$ ), 785 (50.1%) were female, with a mean first-visit age of  
208 72.2 (SD=8.8, range=50-101) years and a mean 15.4 (SD=3.3, range=0-30) years of education.  
209 Of this sample, 797 (50.9%) were CN, 770 (49.1%) had MCI, and 1260 (80.4%) were White. Of  
210 the sample, 707 (45.1) individuals had MBI at baseline, and 860 (54.9) had no MBI at baseline.  
211 On average, participants with MBI were more likely to be male and have MCI [Table 2].

212 Over the average total follow-up period of 4.2 (SD=3.3, range=0.4-15.4) years, 411  
213 (26.2%) individuals developed dementia. In those with SD, KM survival curves out to 6 years  
214 showed that dementia-free survival in the no MBI group was 79.6% (95% CI:76.0-83.4) and in  
215 the MBI group, was 43.7% (38.7-49.4) [Figure 2].

216 Cox proportional hazards regressions showed that sleep-disturbed older adults with MBI  
217 had a 2.2-fold (95%CI:1.9-2.6;  $q < 0.001$ ) greater rate of developing dementia compared to sleep-  
218 disturbed older adults without MBI [Table 3].

219



220 *Analysis 4: Association Between No Baseline Sleep Disturbance and Incident Dementia,*  
221 *stratified by MBI status*

222 Of the total sample ( $n=11921$ ), 6991 (50.1%) were female, with a mean first-visit age of  
223 72.9 (SD=8.8, range=50-104) years and a mean 15.7 (SD=3.1, range=0-29) years of education.  
224 Of this sample, 8628 (72.4%) were CN, 3293 (27.6%) had MCI, and 9269 (77.8%) were White.  
225 Of the sample, 1902 (16.0) individuals had MBI at baseline, and 10019 (84.0) had no MBI at  
226 baseline. On average, participants with MBI were more likely to be male and have MCI [Table  
227 2].

228 Over the average total follow-up period of 5.0 (SD=3.6, range=0.4-16.3) years, 1959  
229 (16.4%) individuals developed dementia. In those without SD, KM survival curves out to 6 years  
230 showed that dementia-free survival in the no MBI group was 85.6% (95% CI:84.7-86.5) and in  
231 the MBI group was 51.8% (48.8-54.9) [Figure 2].

232 Cox proportional hazards regressions showed that non-sleep-disturbed older adults with  
233 MBI had a 1.9-fold (95%CI:1.8-2.0;  $q<0.001$ ) greater rate of developing dementia compared to  
234 non-sleep-disturbed older adults without MBI [Table 3].

235

236 **DISCUSSION**

237 This study aimed to investigate the longitudinal associations between MBI and SD and  
238 explore the SD-associated risk for incident dementia in those with and without comorbid MBI.  
239 As hypothesized, this study demonstrated a bidirectional longitudinal relationship between MBI  
240 and SD; older adults with MBI at baseline developed SD at a greater rate than those without  
241 MBI, and those with SD at baseline developed MBI at a greater rate than those without SD.  
242 Furthermore, individuals concurrently reporting both SD and MBI and individuals experiencing  
243 only MBI developed dementia at faster rates than those with only SD or no SD, respectively.

244 This indicates that there may be additive effects of MBI and SD when considering the risk to  
245 dementia.

246 Previous literature has cross-sectionally linked certain NPS to SD. One study found the  
247 presence of depression, disinhibition, and aberrant motor behavior to be associated with a greater  
248 frequency and severity of SD [43]. This finding may be explained by the difficulties these  
249 behavioral symptoms pose when attempting to fall asleep and stay asleep. Those experiencing  
250 depression have impaired sleep continuity with frequent and long periods of wakefulness,  
251 reduced sleep efficiency, delayed sleep onset, and a reduced total sleep time [9]. SD in  
252 behaviorally disturbed individuals may arise from a disruption of the homeostatic and circadian  
253 drives to sleep [44]. The reverse relationship has also been postulated, where SD may increase  
254 susceptibility to behavioral symptoms such as anxiety and depression [10], poor emotional  
255 generation and regulation [45], and decreased inhibition [11]. This association may be due to  
256 functional connectivity deficits between the amygdala and the ventral anterior cingulate cortex  
257 (vACC) [46], leading to enhanced amygdala responses to negative stimuli, causing increased  
258 aggression and agitation. Sleep deficiencies can also reduce the ability of the medial prefrontal  
259 cortex (mPFC) to inhibit amygdala activity, which, similarly, may lead to behavioral and  
260 emotional instability [47, 48]. Thus, in line with previous literature, the findings of the present  
261 study indicate a possible bidirectional relationship between SD and behavioral impairments, such  
262 that behavioral symptoms may lead to the development of SD and vice versa.

263 SD as a risk factor can contribute to underlying AD pathology [49-51] but may also be  
264 sequelae of existing AD pathology in older adults (Ju et al., 2014). Hence, the bidirectional  
265 association between MBI and SD and a higher rate of decline to dementia with both MBI and SD  
266 may be explained by a common pathology. Having MBI may indicate a more advanced  
267 pathology, which is more likely to disrupt regions of the brain that regulate sleep, leading to SD  
268 [16, 52-59]. Alternatively, a positive feedback mechanism may be in play such that increased SD

269 contributes to MBI, and MBI contributes to SD. In such a scenario, therapies aimed at alleviating  
270 MBI symptoms may help reduce the development or exacerbation of SD, as the reduction of  
271 behavioral symptoms may increase the likelihood of falling asleep and staying asleep.  
272 Conversely, existing medications for the management of SD may help directly or indirectly  
273 reduce behavioral symptoms such as anxiety and depression [60].

274 Additionally, these results are consistent with previous studies that have established the  
275 association between MBI, sleep, and dementia [24, 26, 49]. First, MBI has been linked to  
276 incident cognitive decline and dementia [61]. The greater dementia risk in those with MBI may  
277 relate to the association of MBI with pathological hallmarks of AD, like the formation of  
278 amyloid- $\beta$  ( $A\beta$ ) plaques and hyperphosphorylation and aggregation of tau proteins [62]. Studies  
279 have shown MBI to be associated with  $A\beta$  accumulation [56, 63-65] and hyperphosphorylated  
280 tau deposition [66, 67]. Second, studies have found that in non-dementia older adults, those with  
281 SD have a greater risk of developing dementia (Lee et al., 2020; Robbins et al., 2021; Shi et al.,  
282 2018). Sleep-wake cycles influence  $A\beta$  levels in the brain, where decreased sleep leads to  $A\beta$   
283 accumulation [49-51]. The formation of  $A\beta$  plaques is proposed to decrease sleep quality directly  
284 by disrupting neuronal function in brain regions involved in sleep-wake cycles [68] or indirectly,  
285 worsening the effects in a positive-feedback manner [49]. Studies have also found that tau  
286 accumulation increases with greater SD and vice versa [69]. In light of the association between  
287 MBI and SD with greater cognitive decline and incident dementia due to similar pathological  
288 changes, combining the markers may enhance the ability to detect or predict dementia onset.

289 Based on these findings, clinicians might consider screening for SD and further assess  
290 MBI presence to improve dementia risk assessment in their patients. Several studies suggest that  
291 combining markers of dementia, such as cognition, gait, and MBI, may improve dementia  
292 prognostication [70, 71]. Thus, these markers should be incorporated into dementia risk  
293 assessments to best aid early detection.

294           This study does have limitations. Using a single item from the NPI-Q to assess SD, rated  
295 by an informant, may not identify all presentations of SD, as it captures insomnia and excessive  
296 daytime sedation (EDS). While EDS is a symptom of a variety of SD [72], it is important to  
297 assess this relationship, specifically examining SD such as REM sleep disorder, sleep apnea, and  
298 restless leg syndrome. This will allow for a more complete understating of the impact of SD on  
299 incident dementia, especially as SD, such as REM sleep disorder, are associated with specific  
300 dementias like Lewy body dementia [73]. Additionally, the use of NPI-Q to derive MBI scores  
301 poses a potential limitation as this questionnaire was not designed initially to measure MBI. For  
302 instance, the two-consecutive visits method was used to operationalize MBI because the NPI-Q  
303 has a one-month reference range. However, because symptom presence between study visits  
304 outside of the reference range of the NPI-Q cannot be confirmed, the symptom persistence  
305 criteria required for MBI diagnosis might not be met. The MBI checklist (MBI-C) was  
306 specifically developed for the detection of MBI, has a 6-month reference range, and explicitly  
307 captures later-life emergent and persistent NPS [7, 74]. However, the MBI-C has only very  
308 recently been included in the NACC UDS as an optional measure, so it will take some time to  
309 generate sufficient data with this scale. Therefore, in legacy datasets, using operational  
310 definitions or algorithms to derive MBI status from other measures is necessary. Dichotomizing  
311 SD and MBI did not allow for the assessment of the severity of these items, which may have  
312 provided additional insights. Nonetheless, we did find significant associations with discrete  
313 variables. Future studies could explore this relationship with more robust and continuous  
314 indicators of MBI and SD to ascertain whether this relationship holds when the severity of  
315 symptoms is considered. Lastly, we acknowledge there are other variables, in addition to the  
316 covariates used in this study, that could impact the relationships investigated in this study.  
317 Therefore, future studies should investigate how other variables associated with increased

318 dementia risk, such as obesity, type 2 diabetes, traumatic brain injury, stroke, and hearing loss,  
319 impact these relationships [75].

320         Regardless, this study establishes a starting point for further investigations regarding the  
321 bidirectional relationship between MBI and SD, the relationship between SD and dementia, and  
322 MBI and dementia. Additionally, by illustrating the bidirectional relationship and the  
323 relationship with incident dementia, this study emphasizes the importance of non-cognitive  
324 markers of dementia in pre-dementia screening, especially the importance of SD. Being  
325 longitudinal in design, this study allowed exploration of the bidirectional relationship between  
326 MBI and SD. The large sample size also provided sufficient statistical power to test several  
327 hypotheses, enabling a fuller understanding of the relationship between MBI, SD, and dementia.

## 328 **CONCLUSION**

329         This study demonstrated that older adults with MBI have a greater rate of incident SD,  
330 and those with SD have a greater incidence of MBI. Furthermore, when participants experienced  
331 SD along with MBI, the rate of developing dementia was greater compared to experiencing only  
332 SD. These findings set the stage for treatment studies to determine if treating symptoms of MBI  
333 could reduce the incidence of SD and vice versa, as well as the impact of treating both on  
334 incident cognitive decline and dementia. Nonetheless, both sleep and MBI should be  
335 incorporated into dementia risk assessments to aid with early detection.

336

337

338

339

340

341

342

343 **ACKNOWLEDGEMENTS**

344 The authors have no acknowledgments to report.

345

346 **FUNDING**

- 347 • Dinithi Mudalige received funding from Alberta Innovates as part of the 2022 Summer  
348 Student Award and the Provincial Seniors Health and Continuing Care Studentship as  
349 part of the 2023 Summer Student Award; Alberta Innovates and Seniors Health played no  
350 role in any part of the study design, analysis, or interpretation of this study.
- 351 • Zahinoor Ismail is funded by the Canadian Institutes of Health Research (BCA2633) and  
352 the National Institute for Health and Care Research (NIHR) Exeter Biomedical Research  
353 Centre. The views expressed are those of the author(s) and not necessarily those of the  
354 NIHR or the Department of Health and Social Care.
- 355 • The NACC database is funded by NIA/NIH Grant U24 AG072122. NACC data are  
356 contributed by the NIA-funded ADRCs: P30 AG062429 (PI James Brewer, MD, PhD),  
357 P30 AG066468 (PI Oscar Lopez, MD), P30 AG062421 (PI Bradley Hyman, MD, PhD),  
358 P30 AG066509 (PI Thomas Grabowski, MD), P30 AG066514 (PI Mary Sano, PhD), P30  
359 AG066530 (PI Helena Chui, MD), P30 AG066507 (PI Marilyn Albert, PhD), P30  
360 AG066444 (PI John Morris, MD), P30 AG066518 (PI Jeffrey Kaye, MD), P30  
361 AG066512 (PI Thomas Wisniewski, MD), P30 AG066462 (PI Scott Small, MD), P30  
362 AG072979 (PI David Wolk, MD), P30 AG072972 (PI Charles DeCarli, MD), P30  
363 AG072976 (PI Andrew Saykin, PsyD), P30 AG072975 (PI David Bennett, MD), P30  
364 AG072978 (PI Neil Kowall, MD), P30 AG072977 (PI Robert Vassar, PhD), P30  
365 AG066519 (PI Frank LaFerla, PhD), P30 AG062677 (PI Ronald Petersen, MD, PhD),  
366 P30 AG079280 (PI Eric Reiman, MD), P30 AG062422 (PI Gil Rabinovici, MD), P30  
367 AG066511 (PI Allan Levey, MD, PhD), P30 AG072946 (PI Linda Van Eldik, PhD), P30  
368 AG062715 (PI Sanjay Asthana, MD, FRCP), P30 AG072973 (PI Russell Swerdlow,  
369 MD), P30 AG066506 (PI Todd Golde, MD, PhD), P30 AG066508 (PI Stephen  
370 Strittmatter, MD, PhD), P30 AG066515 (PI Victor Henderson, MD, MS), P30  
371 AG072947 (PI Suzanne Craft, PhD), P30 AG072931 (PI Henry Paulson, MD, PhD), P30  
372 AG066546 (PI Sudha Seshadri, MD), P20 AG068024 (PI Erik Roberson, MD, PhD), P20  
373 AG068053 (PI Justin Miller, PhD), P20 AG068077 (PI Gary Rosenberg, MD), P20  
374 AG068082 (PI Angela Jefferson, PhD), P30 AG072958 (PI Heather Whitson, MD), P30  
375 AG072959 (PI James Leverenz, MD).

376 **CONFLICT OF INTEREST**

377 ZI reports serving as a consultant/advisor to Eisai, Lundbeck, Otsuka, and Roche. All authors  
378 have no conflict of interest to report.

379

380 **DATA AVAILABILITY**

381 The data used in this study were obtained from NACC (<https://naccdata.org/>). Data are available  
382 free of charge to bona fide researchers who submit a research proposal.

383

384 **REFERENCES**

385

- 386 [1] Lynch C (2020) World Alzheimer Report 2019: Attitudes to dementia, a global survey:  
387 Public health: Engaging people in ADRD research. *Alzheimer's & Dementia* **16**, e038255.
- 388 [2] World Health Organization (2021) Global status report on the public health response to  
389 dementia.
- 390 [3] Morris JC (1996) Classification of dementia and Alzheimer's disease. *Acta Neurologica*  
391 *Scandinavica* **94**, 41-50.
- 392 [4] Gauthier S, Albert M, Fox N, Goedert M, Kivipelto M, Mestre-Ferrandiz J, Middleton  
393 LT (2016) Why has therapy development for dementia failed in the last two decades?  
394 *Alzheimer's & Dementia* **12**, 60-64.
- 395 [5] Ismail Z, Black SE, Camicioli R, Chertkow H, Herrmann N, Laforce Jr R, Montero-  
396 Odasso M, Rockwood K, Rosa-Neto P, Seitz D (2020) Recommendations of the 5th  
397 Canadian Consensus Conference on the diagnosis and treatment of dementia. *Alzheimer's*  
398 *& Dementia* **16**, 1182-1195.
- 399 [6] Montero-Odasso M, Pieruccini-Faria F, Ismail Z, Li K, Lim A, Phillips N, Kamkar N,  
400 Sarquis-Adamson Y, Speechley M, Theou O, Verghese J, Wallace L, Camicioli R (2020)  
401 CCCDTD5 recommendations on early non cognitive markers of dementia: A Canadian  
402 consensus. *Alzheimer's Dement (N Y)* **6**, e12068.
- 403 [7] Ismail Z, Smith EE, Geda Y, Sultzer D, Brodaty H, Smith G, Agüera-Ortiz L, Sweet R,  
404 Miller D, Lyketsos CG (2016) Neuropsychiatric symptoms as early manifestations of  
405 emergent dementia: provisional diagnostic criteria for mild behavioral impairment.  
406 *Alzheimer's & Dementia* **12**, 195-202.
- 407 [8] Miner B, Kryger MH (2017) Sleep in the Aging Population. *Sleep Med Clin* **12**, 31-38.
- 408 [9] Nutt D, Wilson S, Paterson L (2008) Sleep disorders as core symptoms of depression.  
409 *Dialogues Clin Neurosci* **10**, 329-336.
- 410 [10] Babson KA, Trainor CD, Feldner MT, Blumenthal H (2010) A test of the effects of acute  
411 sleep deprivation on general and specific self-reported anxiety and depressive symptoms:  
412 An experimental extension. *Journal of Behavior Therapy and Experimental Psychiatry*  
413 **41**, 297-303.
- 414 [11] Drummond SPA, Paulus MP, Tapert SF (2006) Effects of two nights sleep deprivation  
415 and two nights recovery sleep on response inhibition. *Journal of Sleep Research* **15**, 261-  
416 265.
- 417 [12] Rouse HJ, Small BJ, Schinka JA, Loewenstein DA, Duara R, Potter H (2021) Mild  
418 behavioral impairment as a predictor of cognitive functioning in older adults. *Int*  
419 *Psychogeriatr* **33**, 285-293.

- 420 [13] Kassam F, Chen H, Nosheny RL, McGirr A, Williams T, Ng N, Camacho M, Mackin  
421 RS, Weiner MW, Ismail Z (2022) Cognitive profile of people with mild behavioral  
422 impairment in Brain Health Registry participants. *International Psychogeriatrics*, 1-10.
- 423 [14] Creese B, Brooker H, Ismail Z, Wesnes KA, Hampshire A, Khan Z, Megalogeni M,  
424 Corbett A, Aarsland D, Ballard C (2019) Mild behavioral impairment as a marker of  
425 cognitive decline in cognitively normal older adults. *The American Journal of Geriatric*  
426 *Psychiatry* **27**, 823-834.
- 427 [15] Ismail Z, McGirr A, Gill S, Hu S, Forkert ND, Smith EE (2021) Mild Behavioral  
428 Impairment and Subjective Cognitive Decline Predict Cognitive and Functional Decline.  
429 *J Alzheimers Dis* **80**, 459-469.
- 430 [16] Ghahremani M, Nathan S, Smith EE, McGirr A, Goodyear B, Ismail Z (2023) Functional  
431 connectivity and mild behavioral impairment in dementia-free elderly. *Alzheimer's &*  
432 *Dementia: Translational Research & Clinical Interventions* **9**, e12371.
- 433 [17] Matsuoka T, Ismail Z, Narumoto J (2019) Prevalence of Mild Behavioral Impairment and  
434 Risk of Dementia in a Psychiatric Outpatient Clinic.
- 435 [18] Kan CN, Cano J, Zhao X, Ismail Z, Chen CL, Xu X (2022) Prevalence, Clinical  
436 Correlates, Cognitive Trajectories, and Dementia Risk Associated With Mild Behavioral  
437 Impairment in Asians. *J Clin Psychiatry* **83**.
- 438 [19] Wolfova K, Creese B, Aarsland D, Ismail Z, Corbett A, Ballard C, Hampshire A,  
439 Cermakova P (2022) Gender/Sex Differences in the Association of Mild Behavioral  
440 Impairment with Cognitive Aging. *J Alzheimers Dis* **88**, 345-355.
- 441 [20] Vellone D, Ghahremani M, Goodarzi Z, Forkert ND, Smith EE, Ismail Z (2022) Apathy  
442 and APOE in mild behavioral impairment, and risk for incident dementia. *Alzheimers*  
443 *Dement (N Y)* **8**, e12370.
- 444 [21] Ebrahim IM, Ghahremani M, Camicioli R, Smith EE, Ismail Z (2023) Effects of race,  
445 baseline cognition, and APOE on the association of affective dysregulation with incident  
446 dementia: A longitudinal study of dementia-free older adults. *Journal of Affective*  
447 *Disorders* **332**, 9-18.
- 448 [22] Ismail Z, Ghahremani M, Amlish Munir M, Fischer CE, Smith EE, Creese B (2023) A  
449 longitudinal study of late-life psychosis and incident dementia and the potential effects of  
450 race and cognition. *Nature Mental Health* **1**, 273-283.
- 451 [23] McGirr A, Nathan S, Ghahremani M, Gill S, Smith EE, Ismail Z (2022) Progression to  
452 Dementia or Reversion to Normal Cognition in Mild Cognitive Impairment as a Function  
453 of Late-Onset Neuropsychiatric Symptoms. *Neurology* **98**, e2132.
- 454 [24] Shi L, Chen S-J, Ma M-Y, Bao Y-P, Han Y, Wang Y-M, Shi J, Vitiello MV, Lu L (2018)  
455 Sleep disturbances increase the risk of dementia: a systematic review and meta-analysis.  
456 *Sleep medicine reviews* **40**, 4-16.
- 457 [25] Robbins R, Quan SF, Weaver MD, Bormes G, Barger LK, Czeisler CA (2021)  
458 Examining sleep deficiency and disturbance and their risk for incident dementia and all-  
459 cause mortality in older adults across 5 years in the United States. *Aging (Albany NY)* **13**,  
460 3254-3268.
- 461 [26] Lee W, Gray SL, Barthold D, Maust DT, Marcum ZA (2020) Association Between  
462 Informant-Reported Sleep Disturbance and Incident Dementia: An Analysis of the  
463 National Alzheimer's Coordinating Center Uniform Data Set. *Journal of Applied*  
464 *Gerontology* **41**, 285-294.
- 465 [27] Sterniczuk R, Theou O, Rusak B, Rockwood K (2013) Sleep disturbance is associated  
466 with incident dementia and mortality. *Current Alzheimer research* **10**, 767-775.



- 467 [28] Beekly DL, Ramos EM, van Belle G, Deitrich W, Clark AD, Jacka ME, Kukull WA  
468 (2004) The national Alzheimer's coordinating center (NACC) database: an Alzheimer  
469 disease database. *Alzheimer Disease & Associated Disorders* **18**, 270-277.
- 470 [29] Besser L, Kukull W, Knopman DS, Chui H, Galasko D, Weintraub S, Jicha G, Carlsson  
471 C, Burns J, Quinn J (2018) Version 3 of the National Alzheimer's Coordinating Center's  
472 uniform data set. *Alzheimer disease and associated disorders*.
- 473 [30] Morris JC, Weintraub S, Chui HC, Cummings J, DeCarli C, Ferris S, Foster NL, Galasko  
474 D, Graff-Radford N, Peskind ER (2006) The Uniform Data Set (UDS): clinical and  
475 cognitive variables and descriptive data from Alzheimer Disease Centers. *Alzheimer  
476 Disease & Associated Disorders* **20**, 210-216.
- 477 [31] Weintraub S, Salmon D, Mercaldo N, Ferris S, Graff-Radford NR, Chui H, Cummings J,  
478 DeCarli C, Foster NL, Galasko D (2009) The Alzheimer's disease centers' uniform data  
479 set (UDS): The neuropsychological test battery. *Alzheimer disease and associated  
480 disorders* **23**, 91.
- 481 [32] Bliwise DL, Mercaldo ND, Avidan AY, Boeve BF, Greer SA, Kukull WA (2011) Sleep  
482 disturbance in dementia with Lewy bodies and Alzheimer's disease: a multicenter  
483 analysis. *Dementia and geriatric cognitive disorders* **31**, 239-246.
- 484 [33] Bubu OM, Williams ET, Umasabor-Bubu OQ, Kaur SS, Turner AD, Blanc J, Cejudo JR,  
485 Mullins AE, Parekh A, Kam K (2021) Interactive Associations of Neuropsychiatry  
486 Inventory-Questionnaire Assessed Sleep Disturbance and Vascular Risk on Alzheimer's  
487 Disease Stage Progression in Clinically Normal Older Adults. *Frontiers in Aging  
488 Neuroscience* **13**.
- 489 [34] Burke SL, Hu T, Spadola CE, Burgess A, Li T, Cadet T (2018) Treatment of Sleep  
490 Disturbance May Reduce the Risk of Future Probable Alzheimer's Disease. *Journal of  
491 Aging and Health* **31**, 322-342.
- 492 [35] Burke SL, Hu T, Spadola CE, Li T, Naseh M, Burgess A, Cadet T (2018) Mild cognitive  
493 impairment: associations with sleep disturbance, apolipoprotein e4, and sleep  
494 medications. *Sleep Medicine* **52**, 168-176.
- 495 [36] Kaufer DI, Cummings JL, Ketchel P, Smith V, MacMillan A, Shelley T, Lopez OL,  
496 DeKosky ST (2000) Validation of the NPI-Q, a brief clinical form of the  
497 Neuropsychiatric Inventory. *The Journal of neuropsychiatry and clinical neurosciences*  
498 **12**, 233-239.
- 499 [37] Sheikh F, Ismail Z, Mortby ME, Barber P, Cieslak A, Fischer K, Granger R, Hogan DB,  
500 Mackie A, Maxwell CJ (2018) Prevalence of mild behavioral impairment in mild  
501 cognitive impairment and subjective cognitive decline, and its association with caregiver  
502 burden. *International Psychogeriatrics* **30**, 233-244.
- 503 [38] Mortby ME, Ismail Z, Anstey KJ (2018) Prevalence estimates of mild behavioral  
504 impairment in a population-based sample of pre-dementia states and cognitively healthy  
505 older adults. *Int Psychogeriatr* **30**, 221-232.
- 506 [39] Pocock SJ, Clayton TC, Altman DG (2002) Survival plots of time-to-event outcomes in  
507 clinical trials: good practice and pitfalls. *Lancet* **359**, 1686-1689.
- 508 [40] Lee M, Whitsel E, Avery C, Hughes TM, Griswold ME, Sedaghat S, Gottesman RF,  
509 Mosley TH, Heiss G, Lutsey PL (2022) Variation in Population Attributable Fraction of  
510 Dementia Associated With Potentially Modifiable Risk Factors by Race and Ethnicity in  
511 the US. *JAMA Network Open* **5**, e2219672-e2219672.
- 512 [41] Chen J-H, Lin K-P, Chen Y-C (2009) Risk factors for dementia. *Journal of the Formosan  
513 Medical Association* **108**, 754-764.
- 514 [42] R Core Team (2022), ed. Computing RFFS, Austria.

- 515 [43] García-Alberca JM, Lara JP, Cruz B, Garrido V, Gris E, Barbancho MÁ (2013) Sleep  
516 disturbances in Alzheimer's disease are associated with neuropsychiatric symptoms and  
517 antidepressant treatment. *The Journal of nervous and mental disease* **201**, 251-257.
- 518 [44] Borbély AA (1982) A two process model of sleep regulation. *Hum neurobiol* **1**, 195-204.
- 519 [45] Palmer CA, Alfano CA (2017) Sleep and emotion regulation: An organizing, integrative  
520 review. *Sleep Medicine Reviews* **31**, 6-16.
- 521 [46] Motomura Y, Kitamura S, Oba K, Terasawa Y, Enomoto M, Katayose Y, Hida A,  
522 Moriguchi Y, Higuchi S, Mishima K (2013) Sleep debt elicits negative emotional  
523 reaction through diminished amygdala-anterior cingulate functional connectivity. *PloS*  
524 *one* **8**, e56578.
- 525 [47] Motomura Y, Katsunuma R, Yoshimura M, Mishima K (2017) Two days' sleep debt  
526 causes mood decline during resting state via diminished amygdala-prefrontal  
527 connectivity. *Sleep* **40**.
- 528 [48] Ismail Z, Herrmann N, Francis PL, Rothenburg LS, Lobaugh NJ, Leibovitch FS, Black  
529 SE, Lanctôt KL (2009) A SPECT Study of Sleep Disturbance and Alzheimer's Disease.  
530 *Dementia and Geriatric Cognitive Disorders* **27**, 254-259.
- 531 [49] Ju Y-ES, Lucey BP, Holtzman DM (2014) Sleep and Alzheimer disease pathology--a  
532 bidirectional relationship. *Nature reviews. Neurology* **10**, 115-119.
- 533 [50] Winer JR, Mander BA, Kumar S, Reed M, Baker SL, Jagust WJ, Walker MP (2020)  
534 Sleep Disturbance Forecasts  $\beta$ -Amyloid Accumulation across Subsequent Years. *Current*  
535 *Biology* **30**, 4291-4298.e4293.
- 536 [51] Kang J-E, Lim MM, Bateman RJ, Lee JJ, Smyth LP, Cirrito JR, Fujiki N, Nishino S,  
537 Holtzman DM (2009) Amyloid- $\beta$  dynamics are regulated by orexin and the sleep-wake  
538 cycle. *Science* **326**, 1005-1007.
- 539 [52] Matsuoka T, Imai A, Narumoto J (2023) Neuroimaging of mild behavioral impairment: A  
540 systematic review. *Psychiatry and Clinical Neurosciences Reports* **2**, e81.
- 541 [53] Matuskova V, Ismail Z, Nikolai T, Markova H, Cechova K, Nedelska Z, Laczó J, Wang  
542 M, Hort J, Vyhnalek M (2021) Mild Behavioral Impairment Is Associated With Atrophy  
543 of Entorhinal Cortex and Hippocampus in a Memory Clinic Cohort. *Front Aging*  
544 *Neurosci* **13**, 643271.
- 545 [54] Creese B, Arathimos R, Brooker H, Aarsland D, Corbett A, Lewis C, Ballard C, Ismail Z  
546 (2021) Genetic risk for Alzheimer's disease, cognition, and mild behavioral impairment  
547 in healthy older adults. *Alzheimer's & Dementia: Diagnosis, Assessment & Disease*  
548 *Monitoring* **13**, e12164.
- 549 [55] Miao R, Chen HY, Robert P, Smith EE, Ismail Z (2021) White matter hyperintensities  
550 and mild behavioral impairment: Findings from the MEMENTO cohort study. *Cereb*  
551 *Circ Cogn Behav* **2**, 100028.
- 552 [56] Miao R, Chen HY, Gill S, Naude J, Smith EE, Ismail Z (2022) Plasma  $\beta$ -Amyloid in  
553 Mild Behavioural Impairment - Neuropsychiatric Symptoms on the Alzheimer's  
554 Continuum. *J Geriatr Psychiatry Neurol* **35**, 434-441.
- 555 [57] Naude JP, Gill S, Hu S, McGirr A, Forkert ND, Monchi O, Stys PK, Smith EE, Ismail Z,  
556 Initiative AsDN (2020) Plasma neurofilament light: a marker of neurodegeneration in  
557 mild behavioral impairment. *Journal of Alzheimer's disease* **76**, 1017-1027.
- 558 [58] Shu J, Qiang Q, Yan Y, Wen Y, Ren Y, Wei W, Zhang L (2021) Distinct patterns of  
559 brain atrophy associated with mild behavioral impairment in cognitively normal elderly  
560 adults. *International Journal of Medical Sciences* **18**, 2950.
- 561 [59] Gill S, Wang M, Mouches P, Rajashekar D, Sajobi T, MacMaster FP, Smith EE, Forkert  
562 ND, Ismail Z (2021) Neural correlates of the impulse dyscontrol domain of mild  
563 behavioral impairment. *Int J Geriatr Psychiatry* **36**, 1398-1406.

- 564 [60] Krystal AD (2020) Sleep therapeutics and neuropsychiatric illness.  
565 *Neuropsychopharmacology* **45**, 166-175.
- 566 [61] Creese B, Ismail Z (2022) Mild behavioral impairment: measurement and clinical  
567 correlates of a novel marker of preclinical Alzheimer's disease. *Alzheimers Res Ther* **14**,  
568 2.
- 569 [62] Jack Jr CR, Knopman DS, Jagust WJ, Petersen RC, Weiner MW, Aisen PS, Shaw LM,  
570 Vemuri P, Wiste HJ, Weigand SD (2013) Update on hypothetical model of Alzheimer's  
571 disease biomarkers. *Lancet neurology* **12**, 207.
- 572 [63] Sun Y, Xu W, Chen K-L, Shen X-N, Tan L, Yu J-T, for the Alzheimer's Disease  
573 Neuroimaging I (2021) Mild behavioral impairment correlates of cognitive impairments  
574 in older adults without dementia: mediation by amyloid pathology. *Translational*  
575 *Psychiatry* **11**, 577.
- 576 [64] Lussier FZ, Pascoal TA, Chamoun M, Therriault J, Tissot C, Savard M, Kang MS,  
577 Mathotaarachchi S, Benedet AL, Parsons M, Qureshi MNI, Thomas É M, Shin M, Dion  
578 LA, Massarweh G, Soucy JP, Tsai IH, Vitali P, Ismail Z, Rosa-Neto P, Gauthier S (2020)  
579 Mild behavioral impairment is associated with  $\beta$ -amyloid but not tau or  
580 neurodegeneration in cognitively intact elderly individuals. *Alzheimers Dement* **16**, 192-  
581 199.
- 582 [65] Ismail Z, Leon R, Creese B, Ballard C, Robert P, Smith EE (2023) Optimizing detection  
583 of Alzheimer's disease in mild cognitive impairment: a 4-year biomarker study of mild  
584 behavioral impairment in ADNI and MEMENTO. *Mol Neurodegener* **in press**.
- 585 [66] Johansson M, Stomrud E, Insel PS, Leuzy A, Johansson PM, Smith R, Ismail Z,  
586 Janelidze S, Palmqvist S, van Westen D, Mattsson-Carlsson N, Hansson O (2021) Mild  
587 behavioral impairment and its relation to tau pathology in preclinical Alzheimer's disease.  
588 *Transl Psychiatry* **11**, 76.
- 589 [67] Ghahremani M, Wang M, Chen H-Y, Zetterberg H, Smith E, Ismail Z, Initiative AsDN  
590 (2023) Plasma Phosphorylated Tau at Threonine 181 and Neuropsychiatric Symptoms in  
591 Preclinical and Prodromal Alzheimer Disease. *Neurology* **100**, e683-e693.
- 592 [68] Braak H, Braak E (1991) Neuropathological staging of Alzheimer-related changes. *Acta*  
593 *neuropathologica* **82**, 239-259.
- 594 [69] Wang C, Holtzman DM (2020) Bidirectional relationship between sleep and Alzheimer's  
595 disease: role of amyloid, tau, and other factors. *Neuropsychopharmacology* **45**, 104-120.
- 596 [70] Verghese J, Wang C, Lipton RB, Holtzer R (2013) Motoric cognitive risk syndrome and  
597 the risk of dementia. *J Gerontol A Biol Sci Med Sci* **68**, 412-418.
- 598 [71] Guan DX, Chen H-Y, Camicioli R, Montero-Odasso M, Smith EE, Ismail Z (2022) Dual-  
599 task gait and mild behavioral impairment: The interface between non-cognitive dementia  
600 markers. *Experimental Gerontology* **162**, 111743.
- 601 [72] Brown J, Makker HK (2020) An approach to excessive daytime sleepiness in adults. *BMJ*  
602 **368**.
- 603 [73] Boeve BF (2019) REM sleep behavior disorder associated with dementia with Lewy  
604 bodies. *Rapid-eye-movement sleep behavior disorder*, 67-76.
- 605 [74] Hu S, Patten S, Charlton A, Fischer K, Fick G, Smith EE, Ismail Z (2023) Validating the  
606 Mild Behavioral Impairment Checklist in a Cognitive Clinic: Comparisons With the  
607 Neuropsychiatric Inventory Questionnaire. *J Geriatr Psychiatry Neurol* **36**, 107-120.
- 608 [75] Livingston G, Huntley J, Sommerlad A, Ames D, Ballard C, Banerjee S, Brayne C, Burns  
609 A, Cohen-Mansfield J, Cooper C (2020) Dementia prevention, intervention, and care:  
610 2020 report of the Lancet Commission. *The Lancet* **396**, 413-446.
- 611

612 **TABLES**  
613

| <b>Table 1. Participant characteristics</b> |                        |                        |                      |                      |
|---------------------------------------------|------------------------|------------------------|----------------------|----------------------|
|                                             | <b>Analysis 1*</b>     | <b>Analysis 2*</b>     | <b>Analysis 3*</b>   | <b>Analysis 4*</b>   |
| <b>n</b>                                    | 11277                  | 10535                  | 1567                 | 11921                |
| <b>First-Visit Age (Years)</b>              | 72.7 (8.8), 50.0-104.0 | 72.7 (8.8), 50.0-101.0 | 72.2 (8.8), 50.0-101 | 72.9 (8.8), 50.0-104 |
| <b>Females</b>                              | 6658 (59.0)            | 6412 (60.9)            | 785 (50.1)           | 6991 (58.6)          |
| <b>Education (Years)</b>                    | 15.7 (3.1), 0-29.0     | 15.7 (3.2), 0-29.0     | 15.4 (3.3), 0-30.0   | 15.7 (3.1), 0-29.0   |
| <b>Cognitive Status</b>                     |                        |                        |                      |                      |
| CN                                          | 8579 (76.1)            | 8375 (79.5)            | 797 (50.9)           | 8628 (72.4)          |
| MCI                                         | 2698 (23.9)            | 2160 (20.5)            | 770 (49.1)           | 3293 (27.6)          |
| <b>Race: White</b>                          | 8721 (77.3)            | 8063 (76.5)            | 1260 (80.4)          | 9269 (77.8)          |
| <b>Predictor Characteristics</b>            |                        |                        |                      |                      |
| MBI                                         | 1562 (13.9)            | -                      | 707 (45.1)           | 1902 (16.0)          |
| No MBI                                      | 9715 (86.1)            | -                      | 860 (54.9)           | 10019 (84.0)         |
| SD                                          | -                      | 820 (7.8)              | -                    | -                    |
| No SD                                       | -                      | 9715 (92.2)            | -                    | -                    |

*Note.* \*Analysis 1: Baseline MBI and incident sleep disturbance, Analysis 2: Baseline sleep disturbance and incident MBI, Analysis 3: Baseline MBI and incident dementia within those with sleep disturbance. Analysis 4: baseline MBI and incident dementia in those without sleep disturbance. All values for continuous variables are shown in mean (SD), range. Values were rounded to one decimal place where appropriate. Categorical variables are shown as n (%). Participants missing data in any of the variables were excluded from descriptive statistical analysis.

Abbreviations: MBI, mild behavioral impairment; CN, cognitively normal; MCI, mild cognitive impairment; SD, sleep disturbance

614  
615  
616  
617  
618  
619  
620  
621  
622  
623  
624  
625  
626

**Table 2. Participant Characteristics for Analyses 1, 2, 3 and 4**

| <b>Analysis 1</b>              | <b>Total (n=11277)</b> | <b>MBI (n=1562)</b>         | <b>No MBI (n=9715)</b>      | <b>p</b>            |
|--------------------------------|------------------------|-----------------------------|-----------------------------|---------------------|
| <b>n</b>                       | 11277                  | 1562                        | 9715                        |                     |
| <b>First-Visit Age (Years)</b> | 72.7 (8.8), 50-104     | 72.8 (8.5), 50-104          | 72.7 (8.8), 50-101          | 0.501 <sup>w</sup>  |
| <b>Females</b>                 | 6658 (59.0)            | 705 (45.1)                  | 5953 (61.3)                 | <0.001 <sup>c</sup> |
| <b>Education (Years)</b>       | 15.7 (3.1), 0-29       | 15.7 (3.2), 1-29            | 15.7 (3.0), 0-29            | 0.869 <sup>w</sup>  |
| <b>Cognitive Diagnosis</b>     |                        |                             |                             | <0.001 <sup>c</sup> |
|                                | CN                     | 8579 (76.1)                 | 768 (49.2)                  | 7811 (80.4)         |
|                                | MCI                    | 2698 (23.9)                 | 794 (50.8)                  | 1904 (19.6)         |
| <b>Race: White*</b>            | 8721 (77.3)            | 1301 (83.3)                 | 7420 (76.4)                 | <0.001 <sup>c</sup> |
| <b>Analysis 2</b>              | <b>Total (n=10535)</b> | <b>SD Present (n=820)</b>   | <b>SD Absent (n=9715)</b>   | <b>p</b>            |
| <b>First-Visit Age (Years)</b> | 72.7 (8.8), 50-101     | 72.2 (8.8), 50-96           | 72.7 (8.8), 50-101          | 0.106 <sup>w</sup>  |
| <b>Females</b>                 | 6412 (60.9)            | 459 (56.0)                  | 5953 (61.3)                 | 0.003 <sup>c</sup>  |
| <b>Education (Years)</b>       | 15.7 (3.2), 0-29       | 15.5 (3.2), 0-25            | 15.7 (3.0), 0-29            | 0.054 <sup>w</sup>  |
| <b>Cognitive Diagnosis</b>     |                        |                             |                             | <0.001 <sup>c</sup> |
|                                | CN                     | 8375 (79.5)                 | 564 (68.8)                  | 7811 (80.4)         |
|                                | MCI                    | 2160 (20.5)                 | 256 (31.2)                  | 1904 (19.6)         |
| <b>Race: White*</b>            | 8063 (76.5)            | 643 (78.4)                  | 7420 (76.4)                 | 0.115 <sup>c</sup>  |
| <b>Analysis 3</b>              | <b>Total (n=1567)</b>  | <b>MBI Present (n=707)</b>  | <b>MBI Absent (n=860)</b>   | <b>p</b>            |
| <b>First-Visit Age (Years)</b> | 72.2 (8.8), 50-101     | 72.2 (8.8), 50-101          | 72.3 (8.8), 50-96           | 0.877 <sup>w</sup>  |
| <b>Females</b>                 | 785 (50.1)             | 307 (43.4)                  | 478 (55.6)                  | <0.001 <sup>c</sup> |
| <b>Education (Years)</b>       | 15.4 (3.3), 0-30       | 15.1 (3.5), 0-30            | 15.6 (3.2), 0-25            | 0.017 <sup>w</sup>  |
| <b>Cognitive Diagnosis</b>     |                        |                             |                             | <0.001 <sup>c</sup> |
|                                | CN                     | 797 (50.9)                  | 233 (33.0)                  | 564 (65.6)          |
|                                | MCI                    | 770 (49.1)                  | 474 (67.0)                  | 296 (34.4)          |
| <b>Race: White*</b>            | 1260 (80.4)            | 581 (82.2)                  | 679 (79.0)                  | 0.008 <sup>c</sup>  |
| <b>Analysis 4</b>              | <b>Total (n=11921)</b> | <b>MBI Present (n=1902)</b> | <b>MBI Absent (n=10019)</b> | <b>p</b>            |
| <b>First-Visit Age (Years)</b> | 72.9 (8.8), 50-104     | 73.1 (8.6), 50-104          | 72.8 (8.8), 50-101          | 0.089 <sup>w</sup>  |
| <b>Females</b>                 | 6991 (58.6)            | 871 (45.8)                  | 6120 (61.1)                 | <0.001 <sup>c</sup> |
| <b>Education (Years)</b>       | 15.7 (3.1), 0-29       | 15.6 (3.2), 1-29            | 15.7 (3.0), 0-29            | 0.218 <sup>w</sup>  |
| <b>Cognitive Diagnosis</b>     |                        |                             |                             | <0.001 <sup>c</sup> |
|                                | CN                     | 8628 (72.4)                 | 783 (41.2)                  | 7845 (78.3)         |
|                                | MCI                    | 3293 (27.6)                 | 1119 (58.8)                 | 2174 (21.7)         |
| <b>Race: White**</b>           | 9269 (77.8)            | 1590 (83.6)                 | 7679 (76.6)                 | <0.001 <sup>c</sup> |

*Note:* All values for continuous variables are shown in mean (standard deviation). Values were rounded to one decimal place where appropriate, except for p-values which were rounded to three decimal places. Categorical variables are shown as n (%). Participants missing data for any of the variables were excluded from descriptive statistical analysis. Analysis (1): baseline mild behavioral impairment (MBI) and incident sleep disturbance (SD); (2) baseline SD and incident MBI; (3) baseline MBI in those with SD and incident dementia; (4) baseline MBI in those without SD and incident dementia

\*Non-white races: Black, First Nations American/Alaskan, Native Hawaiian/Other Pacific Islander, Asian or Other.  
w – Wilcoxon Rank Sum (Mann-Whitney) Test; c – Chi-Squared Test

627

**Table 3. Multivariable Cox regression models for the association between baseline MBI or sleep disturbance with incident sleep disturbance, MBI or dementia using MBI, SD and cognitive diagnosis as time-dependent variables**

| Exposure Variable                             | Outcome Variable  | HR   | 95% CI    | <i>p</i> |
|-----------------------------------------------|-------------------|------|-----------|----------|
| MBI                                           | Sleep Disturbance | 3.04 | 2.77-3.33 | <0.001   |
| Sleep disturbance                             | MBI               | 1.52 | 1.28-1.80 | <0.001   |
| MBI status in those with sleep disturbance    | Dementia          | 2.20 | 1.91-2.53 | <0.001   |
| MBI status in those without sleep disturbance | Dementia          | 1.92 | 1.81-2.03 | <0.001   |

*Note.* Associations were tested using multivariable Cox regression models, adjusted for first-visit age, sex, years of education, cognitive diagnosis (CN/MCI), and race. Both MBI status and sleep disturbance were dichotomized. The false rate discovery method was used to adjust *p* values for multiple comparisons.

Abbreviations: MBI, mild behavioral impairment; CN, cognitively normal; MCI, mild cognitive impairment; HR, hazard ratio; CI, confidence interval

628

629

630

631

632

633

634

635

636

637

638

639

640

641

642

643

644

645

646

647 **FIGURES**

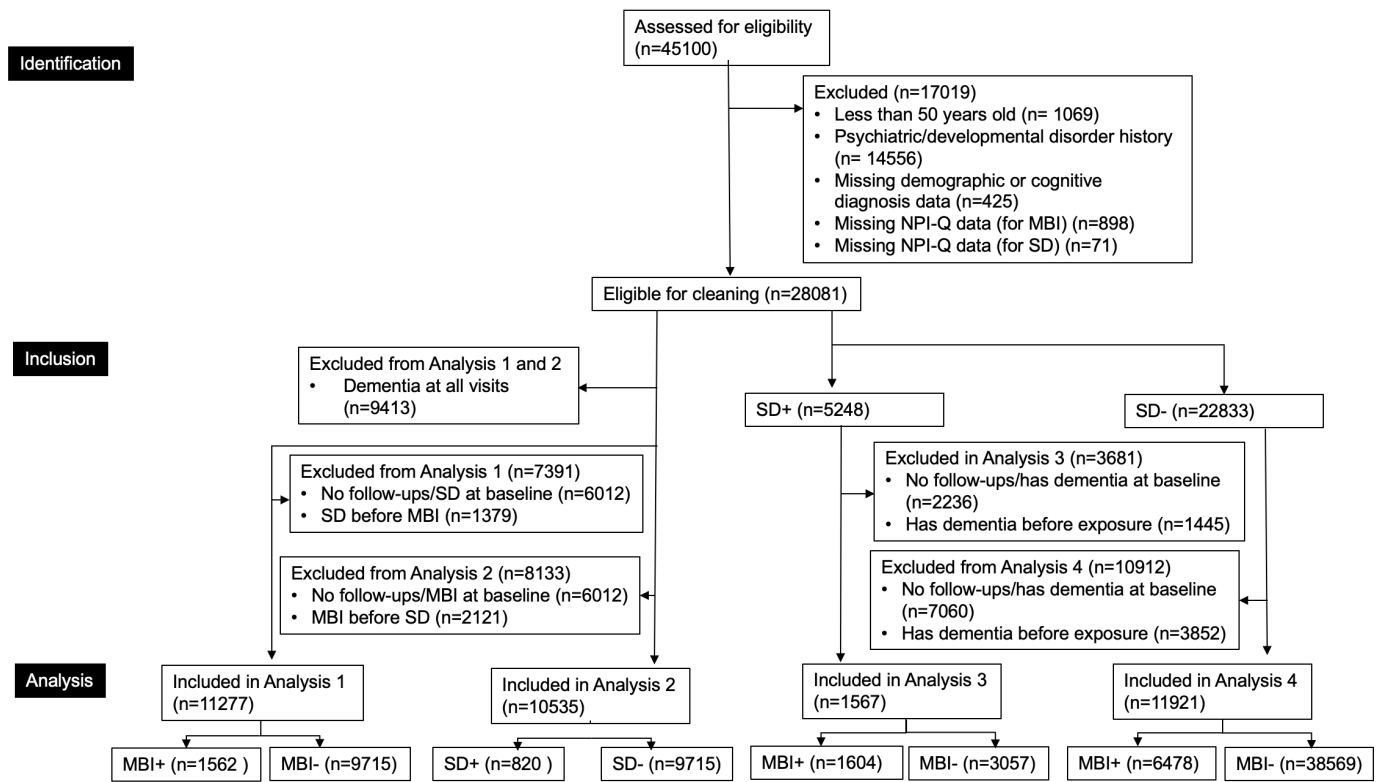

648 **Figure 1. Participant Flow Diagram.** Analysis 1 examined whether baseline MBI was  
649 associated with incident sleep disturbance. Analysis 2 examined whether baseline sleep  
650 disturbance was associated with incident MBI. Analysis 3 explored whether baseline MBI was  
651 associated with dementia in those with sleep disturbance. Analysis 4 explored whether baseline  
652 MBI was associated with dementia in those without sleep disturbance. Abbreviations: NPI-Q,  
653 Neuropsychiatric Inventory Questionnaire; MBI, mild behavioral impairment; SD, sleep  
654 disturbance  
655  
656

657

658

659

660

661

662

663

664

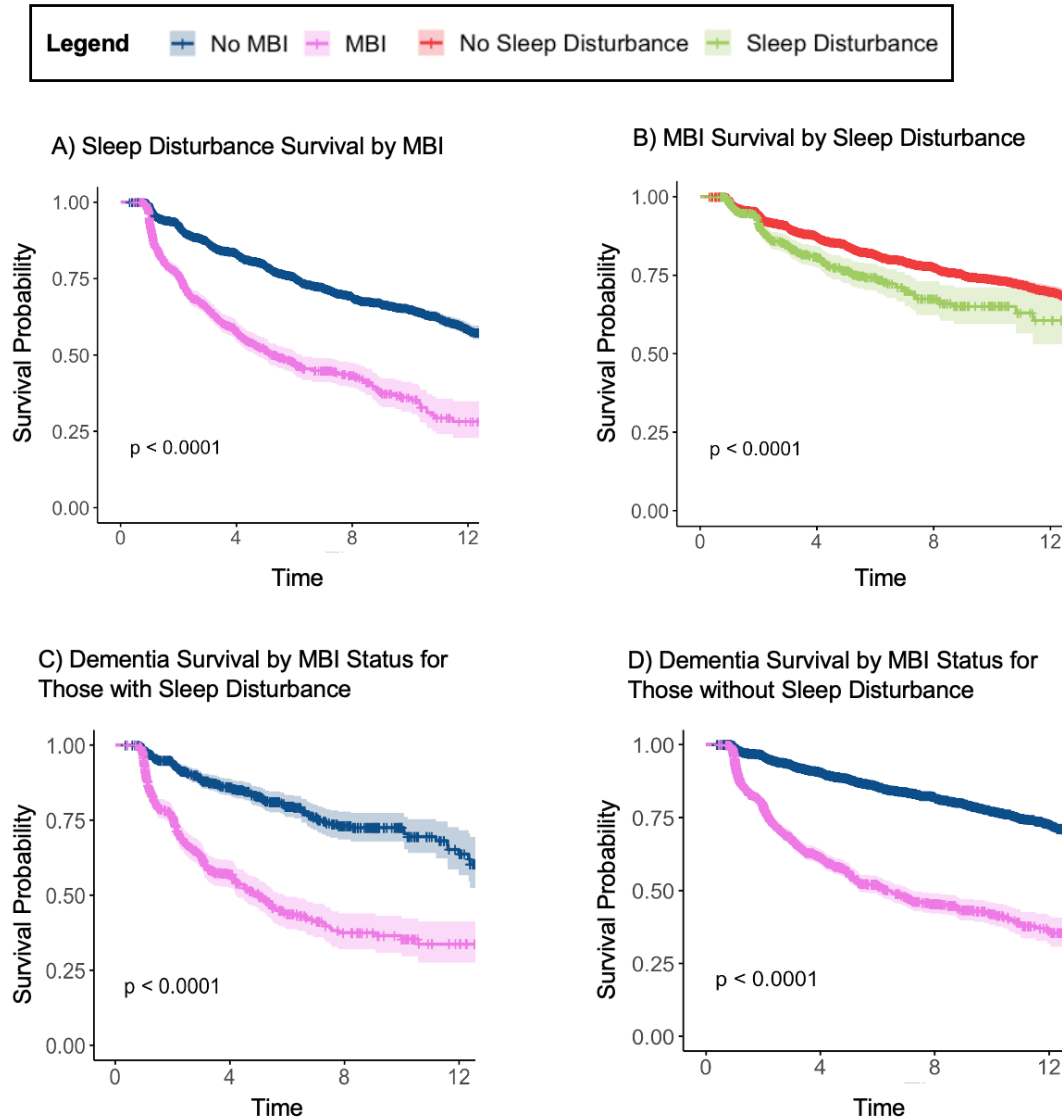

665  
666 **Figure 2. Kaplan-Meier Survival Curves** up to 12 years for (A) sleep disturbance-free survival  
667 based on MBI status ( $n = 11277$ ); (B) MBI-free survival based on sleep disturbance ( $n = 10535$ );  
668 (C) dementia-free survival based MBI with concurrent sleep disturbance ( $n = 1567$ ); (D)  
669 dementia-free survival based MBI without concurrent sleep disturbance ( $n = 11921$ ).  
670

671
